# Supplementary material for: High regularity of Z-DNA revealed by ultra high-resolution crystal structure at 0.55 Å
Source: PubMed Central journal article supplement — Nucleic Acids Res. 2011 Apr 1;39(14):6238–48. doi: 10.1093/nar/gkr202 (PMC3152349; doi:10.1093/nar/gkr202), 2011-04-01
Supplement: supp_gkr202_zdna_suppl.pdf [file supp_gkr202_zdna_suppl.pdf]

### Supplementary Table 1

Deviations (Å) between the current model and selected models of d(CGCGCG)<sub>2</sub> in the PDB. The pairwise superpositions were calculated for all non-H atoms of the Z-DNA molecule (“All”) or only for selected subsets in the indicated chemical moieties.

| PDB code                                      | 1D48   | 1DCG  | 2DCG  | 1I0T  | 1ICK  |
|-----------------------------------------------|--------|-------|-------|-------|-------|
| Crystal form                                  | B      | A     | A     | B     | A     |
| All 240 atoms                                 |        |       |       |       |       |
| Rmsd                                          | 0.604  | 0.323 | 0.124 | 0.790 | 0.094 |
| Average                                       | 0.498  | 0.263 | 0.115 | 0.603 | 0.084 |
| Maximum                                       | 3.067  | 1.545 | 0.272 | 4.543 | 0.219 |
| at                                            | OP1_5  | OP1_9 | C5_7  | OP1_9 | O6_6  |
| Nucleobases only, 114 atoms                   |        |       |       |       |       |
| Rmsd                                          | 0.393  | 0.231 | 0.134 | 0.435 | 0.099 |
| Average                                       | 0.375  | 0.213 | 0.127 | 0.415 | 0.088 |
| Maximum                                       | 0.747  | 0.462 | 0.263 | 0.808 | 0.206 |
| at                                            | N4_7   | C8_6  | C5_7  | N7_10 | C5_7  |
| Phosphate groups only, 50 atoms               |        |       |       |       |       |
| Rmsd                                          | 0.964  | 0.500 | 0.113 | 1.326 | 0.078 |
| Average                                       | 0.813  | 0.400 | 0.103 | 1.039 | 0.072 |
| Maximum                                       | 2.964  | 1.394 | 0.197 | 4.175 | 0.144 |
| at                                            | OP1_5  | OP1_9 | OP1_4 | OP1_9 | O3'_1 |
| Sugars only (including O3' and O5'), 96 atoms |        |       |       |       |       |
| Rmsd                                          | 0.516  | 0.270 | 0.105 | 0.642 | 0.087 |
| Average                                       | 0.475  | 0.250 | 0.097 | 0.581 | 0.078 |
| Maximum                                       | 1.184  | 0.616 | 0.223 | 2.412 | 0.186 |
| at                                            | O3'_12 | O3'_7 | C2'_1 | C3'_7 | C5'_7 |

## Supplementary Table 2

Average values of bond lengths (Å) and angles (°) in the current structure and in representative structures of d(CGCGCG)<sub>2</sub> from the PDB. Values in parentheses are root-mean-square deviations (rmsd) from each average over the bonds (or angles) of the same type in the same moiety. Rmsd values calculated for deviations of all bonds (or angles) within entire moieties from the respective mean values of their individual types are also given. The corresponding targets (with their standard uncertainties) from the stereochemical restraint library of Parkinson *et al.* (1996) are given in the last column. Bold-face numbers highlight library standards that do not agree with the present results and likely need adjustment.

| Bonds                         | current  | 1D48      | 1DCG      | 2DCG      | 1I0T      | 1ICK      | Parkinson |
|-------------------------------|----------|-----------|-----------|-----------|-----------|-----------|-----------|
| Cytosine (average of 6 bonds) |          |           |           |           |           |           |           |
| N1-C2                         | 1.391(3) | 1.366(8)  | 1.387(13) | 1.401(17) | 1.403(14) | 1.399(13) | 1.397(10) |
| N1-C6                         | 1.367(4) | 1.378(10) | 1.376(11) | 1.373(19) | 1.366(19) | 1.356(10) | 1.367(6)  |
| N1-C1'                        | 1.467(2) | 1.494(6)  | 1.515(30) | 1.491(31) | 1.453(9)  | 1.473(4)  | 1.470(12) |
| C2-N3                         | 1.351(3) | 1.364(9)  | 1.364(16) | 1.364(8)  | 1.358(8)  | 1.363(11) | 1.353(8)  |
| C2-O2                         | 1.248(3) | 1.210(4)  | 1.234(10) | 1.237(11) | 1.239(10) | 1.245(13) | 1.240(9)  |
| N3-C4                         | 1.343(2) | 1.377(7)  | 1.357(14) | 1.357(20) | 1.333(8)  | 1.338(19) | 1.335 (7) |
| C4-C5                         | 1.431(4) | 1.423(10) | 1.419(19) | 1.450(20) | 1.429(5)  | 1.429(11) | 1.425(8)  |
| C4-N4                         | 1.327(1) | 1.353(4)  | 1.364(9)  | 1.342(16) | 1.338(21) | 1.342(8)  | 1.335(9)  |
| C5-C6                         | 1.345(5) | 1.327(5)  | 1.334(11) | 1.334(14) | 1.357(22) | 1.345(10) | 1.339(8)  |
| rmsd (54 bonds)               | 0.0033   | 0.0077    | 0.0157    | 0.0194    | 0.0137    | 0.0120    |           |
| Guanine (average of 6 bonds)  |          |           |           |           |           |           |           |
| N1-C2                         | 1.374(2) | 1.344(7)  | 1.354(18) | 1.367(10) | 1.369(16) | 1.361(12) | 1.373(8)  |
| N1-C6                         | 1.384(4) | 1.338(7)  | 1.353(18) | 1.374(12) | 1.389(17) | 1.394(16) | 1.391(7)  |
| N9-C1'                        | 1.449(4) | 1.413(13) | 1.416(23) | 1.429(30) | 1.450(11) | 1.456(7)  | 1.459(9)  |
| C2-N3                         | 1.329(1) | 1.354(7)  | 1.341(15) | 1.342(19) | 1.334(7)  | 1.339(12) | 1.323(8)  |
| C2-N2                         | 1.342(3) | 1.255(7)  | 1.294(13) | 1.302(14) | 1.345(16) | 1.349(9)  | 1.341(10) |
| N3-C4                         | 1.347(1) | 1.351(9)  | 1.359(17) | 1.346(22) | 1.346(14) | 1.349(10) | 1.350(7)  |
| C4-C5                         | 1.383(3) | 1.367(8)  | 1.364(15) | 1.358(18) | 1.386(5)  | 1.381(13) | 1.379(7)  |
| C4-N9                         | 1.380(1) | 1.397(10) | 1.403(18) | 1.399(8)  | 1.374(11) | 1.386(12) | 1.375(8)  |
| C5-C6                         | 1.416(5) | 1.430(6)  | 1.425(9)  | 1.426(23) | 1.416(15) | 1.415(9)  | 1.419(10) |
| C5-N7                         | 1.390(5) | 1.371(12) | 1.378(19) | 1.382(25) | 1.388(7)  | 1.399(14) | 1.388(6)  |

|                 |          |           |           |           |           |           |          |
|-----------------|----------|-----------|-----------|-----------|-----------|-----------|----------|
| C6-O6           | 1.249(3) | 1.272(15) | 1.267(7)  | 1.261(16) | 1.245(14) | 1.256(9)  | 1.237(9) |
| N7-C8           | 1.308(6) | 1.329(12) | 1.334(17) | 1.317(26) | 1.298(20) | 1.301(19) | 1.305(6) |
| C8-N9           | 1.378(4) | 1.340(7)  | 1.348(17) | 1.365(13) | 1.390(19) | 1.378(7)  | 1.374(7) |
| rmsd (78 bonds) | 0.0038   | 0.0096    | 0.0163    | 0.0193    | 0.0139    | 0.0119    |          |

2'-Deoxyribose (average of 12 bonds)

|                 |          |           |           |           |           |           |           |
|-----------------|----------|-----------|-----------|-----------|-----------|-----------|-----------|
| C1'-C2'         | 1.527(3) | 1.557(32) | 1.553(45) | 1.564(43) | 1.532(7)  | 1.519(25) | 1.521(14) |
| C1'-O4'         | 1.421(8) | 1.435(25) | 1.434(32) | 1.440(37) | 1.425(13) | 1.445(31) | 1.420(13) |
| C2'-C3'         | 1.521(4) | 1.507(26) | 1.519(47) | 1.520(39) | 1.494(13) | 1.506(15) | 1.518(10) |
| C3'-C4'         | 1.533(5) | 1.554(25) | 1.525(26) | 1.568(26) | 1.520(13) | 1.538(7)  | 1.528(10) |
| C3'-O3'         | 1.436(7) | 1.409(18) | 1.443(28) | 1.442(29) | 1.423(11) | 1.422(10) | 1.431(13) |
| C4'-C5'         | 1.510(6) | 1.533(15) | 1.533(28) | 1.528(22) | 1.505(16) | 1.518(12) | 1.511(8)  |
| C4'-O4'         | 1.439(7) | 1.429(26) | 1.433(38) | 1.446(23) | 1.434(12) | 1.439(14) | 1.446(11) |
| C5'-O5'         | 1.434(9) | 1.416(20) | 1.439(33) | 1.424(32) | 1.438(10) | 1.436(14) | 1.440(16) |
| rmsd (96 bonds) | 0.0064   | 0.0240    | 0.0353    | 0.0321    | 0.0122    | 0.0175    |           |

Phosphodiester (average of 10 bonds)

|                     |          |           |           |           |           |           |           |
|---------------------|----------|-----------|-----------|-----------|-----------|-----------|-----------|
| P <sup>+</sup> -O3' | 1.593(7) | 1.586(17) | 1.610(32) | 1.601(13) | 1.588(24) | 1.603(9)  | 1.607(12) |
| P-O5'               | 1.595(9) | 1.623(15) | 1.620(40) | 1.602(23) | 1.591(16) | 1.599(10) | 1.593(10) |
| P-OP1               | 1.491(5) | 1.430(33) | 1.441(48) | 1.461(36) | 1.489(20) | 1.493(14) | 1.485(17) |
| P-OP2               | 1.494(7) | 1.449(46) | 1.477(62) | 1.465(27) | 1.503(19) | 1.495(10) | 1.485(17) |
| rmsd (40 bonds)     | 0.0064   | 0.0306    | 0.0469    | 0.0262    | 0.0200    | 0.0108    |           |

Angles

|                                | curr     | 1D48      | 1DCG      | 2DCG      | 1I0T      | 1ICK      | Parkinson |
|--------------------------------|----------|-----------|-----------|-----------|-----------|-----------|-----------|
| Cytosine (average of 6 angles) |          |           |           |           |           |           |           |
| C2-N1-C6                       | 120.9(3) | 121.3(6)  | 121.8(12) | 120.6(14) | 120.7(12) | 120.4(8)  | 120.3(4)  |
| C2-N1-C1'                      | 118.8(7) | 116.0(9)  | 115.6(16) | 116.9(10) | 118.5(15) | 118.8(8)  | 118.8(11) |
| C6-N1-C1'                      | 120.3(8) | 122.6(6)  | 122.6(11) | 122.5(15) | 120.6(10) | 120.8(10) | 120.8(12) |
| N1-C2-N3                       | 119.3(3) | 116.3(9)  | 116.7(15) | 118.3(13) | 118.8(15) | 119.1(13) | 119.2(7)  |
| N1-C2-O2                       | 119.0(4) | 123.7(10) | 121.8(12) | 120.8(18) | 118.7(9)  | 119.5(9)  | 118.9(6)  |
| N3-C2-O2                       | 121.7(4) | 119.9(10) | 121.4(16) | 120.9(15) | 122.6(8)  | 121.5(11) | 121.9(7)  |
| C2-N3-C4                       | 120.1(2) | 123.8(13) | 122.2(19) | 121.3(11) | 120.4(11) | 119.6(7)  | 119.9(5)  |

|                  |          |           |           |           |           |           |          |
|------------------|----------|-----------|-----------|-----------|-----------|-----------|----------|
| N3-C4-C5         | 121.6(2) | 117.9(11) | 120.2(14) | 120.2(13) | 122.3(12) | 122.3(5)  | 121.9(4) |
| N3-C4-N4         | 118.3(2) | 118.8(15) | 117.8(21) | 118.9(17) | 119.0(7)  | 117.8(10) | 118.0(7) |
| C5-C4-N4         | 120.2(2) | 123.4(14) | 122.0(20) | 120.8(23) | 118.7(11) | 119.8(14) | 120.2(7) |
| C4-C5-C6         | 117.4(3) | 117.9(4)  | 117.8(14) | 117.4(21) | 116.8(17) | 116.7(4)  | 117.4(5) |
| C5-C6-N1         | 120.8(2) | 122.6(6)  | 121.2(11) | 122.1(7)  | 121.0(9)  | 121.8(4)  | 121.0(5) |
| rmsd (72 angles) | 0.41     | 1.01      | 1.55      | 1.54      | 1.17      | 0.90      |          |

Cytidine sugars (average of 6 angles)

|                        |           |           |           |           |           |           |           |
|------------------------|-----------|-----------|-----------|-----------|-----------|-----------|-----------|
| N1-C1'-C2'             | 115.3(4)  | 115.8(7)  | 114.8(22) | 116.5(7)  | 115.5(9)  | 117.4(13) | 114.2(16) |
| N1-C1'-O4'             | 108.1(6)  | 107.6(12) | 108.0(17) | 106.7(10) | 107.9(10) | 105.2(12) | 107.8(8)  |
| C2'-C1'-O4'            | 106.8(6)  | 106.5(14) | 105.1(20) | 105.5(27) | 106.3(12) | 106.6(10) | 106.1(11) |
| C1'-C2'-C3'            | 103.8(18) | 103.5(21) | 102.6(20) | 104.1(27) | 103.6(29) | 104.7(23) | 102.7(14) |
| C2'-C3'-C4'            | 103.0(3)  | 105.1(13) | 106.3(26) | 104.2(21) | 104.4(5)  | 103.7(8)  | 103.2(10) |
| C2'-C3'-O3'            | 110.7(23) | 114.0(15) | 112.0(41) | 111.2(19) | 110.9(16) | 112.4(22) | 110.6(27) |
| C4'-C3'-O3'            | 109.5(16) | 105.9(6)  | 107.1(30) | 106.8(20) | 110.3(14) | 110.7(22) | 110.3(22) |
| C3'-C4'-C5'            | 112.9(8)  | 112.4(11) | 112.1(24) | 111.5(16) | 113.2(8)  | 114.9(14) | 114.7(15) |
| C3'-C4'-O4'            | 106.1(5)  | 105.0(7)  | 104.9(22) | 103.6(15) | 105.9(9)  | 106.2(8)  | 105.6(10) |
| C5'-C4'-O4'            | 109.1(4)  | 109.4(8)  | 108.6(21) | 108.1(15) | 109.3(7)  | 109.2(6)  | 109.4(16) |
| C1'-O4'-C4'            | 110.4(6)  | 111.4(18) | 112.2(11) | 111.0(19) | 110.2(7)  | 109.2(6)  | 109.7(14) |
| C4'-C5'-O5'            | 107.8(8)  | 105.3(19) | 104.5(35) | 105.7(12) | 109.4(7)  | 109.4(7)  | 110.2(14) |
| C3'-O3'-P <sup>+</sup> | 121.6(5)  | 124.4(5)  | 123.7(50) | 121.6(9)  | 123.9(23) | 122.0(10) | 119.7(12) |
| C5'-O5'-P              | 119.2(11) | 116.2(18) | 118.1(28) | 119.6(19) | 119.7(11) | 120.8(11) | 120.9(16) |
| rmsd (82 angles)       | 0.73      | 1.59      | 1.98      | 1.89      | 1.21      | 1.11      |           |

Guanine (average of 6 angles)

|          |          |           |           |           |           |           |          |
|----------|----------|-----------|-----------|-----------|-----------|-----------|----------|
| C6-N1-C2 | 124.3(3) | 120.5(7)  | 122.5(6)  | 123.5(14) | 124.7(9)  | 125.0(5)  | 125.1(6) |
| N1-C2-N3 | 124.2(3) | 128.0(8)  | 125.0(10) | 124.1(15) | 124.3(7)  | 123.9(4)  | 123.9(6) |
| N1-C2-N2 | 116.5(2) | 119.6(13) | 18.3(17)  | 117.6(17) | 116.9(11) | 116.8(9)  | 116.2(9) |
| N3-C2-N2 | 119.4(3) | 112.4(10) | 16.6(11)  | 118.2(11) | 118.8(14) | 119.4(12) | 119.9(7) |
| C2-N3-C4 | 112.0(2) | 109.5(8)  | 111.9(14) | 111.9(9)  | 111.7(8)  | 112.1(7)  | 111.9(5) |
| N3-C4-C5 | 128.3(4) | 128.7(5)  | 127.8(12) | 128.7(13) | 128.2(4)  | 128.2(7)  | 128.6(5) |
| N3-C4-N9 | 126.5(6) | 127.6(7)  | 127.2(17) | 126.2(15) | 126.2(7)  | 126.3(7)  | 126.0(6) |
| C5-C4-N9 | 105.2(3) | 103.7(3)  | 105.1(12) | 105.1(17) | 105.6(7)  | 105.5(10) | 105.4(4) |

|                   |          |          |           |           |           |           |                  |
|-------------------|----------|----------|-----------|-----------|-----------|-----------|------------------|
| C4-C5-C6          | 118.6(2) | 116.5(5) | 117.2(12) | 118.1(10) | 119.0(9)  | 119.1(9)  | 118.8(6)         |
| C4-C5-N7          | 111.1(4) | 113.0(6) | 111.8(10) | 112.1(11) | 110.6(12) | 110.8(6)  | 110.7(5)         |
| C6-C5-N7          | 130.4(4) | 130.5(8) | 130.9(10) | 129.8(12) | 130.4(16) | 130.2(6)  | 130.4(6)         |
| C5-C6-N1          | 112.5(3) | 116.8(9) | 115.6(11) | 113.5(13) | 112.0(15) | 111.8(9)  | 111.5(5)         |
| C5-C6-O6          | 126.9(3) | 123.1(9) | 125.0(13) | 126.6(9)  | 126.8(12) | 127.8(12) | 128.6(6)         |
| N1-C6-O6          | 120.6(2) | 120.2(5) | 119.4(9)  | 119.9(15) | 121.2(7)  | 120.4(7)  | 119.9(6)         |
| C5-N7-C8          | 104.2(3) | 102.7(4) | 103.5(11) | 103.6(13) | 104.7(14) | 103.9(4)  | 104.3(5)         |
| N7-C8-N9          | 113.4(2) | 113.8(5) | 113.4(13) | 113.4(14) | 113.2(5)  | 114.1(6)  | 113.1(5)         |
| C8-N9-C4          | 106.3(2) | 106.8(6) | 106.1(11) | 105.7(19) | 105.9(8)  | 105.7(6)  | 106.4(4)         |
| C4-N9-C1'         | 129.0(7) | 128.9(6) | 130.0(13) | 129.8(15) | 129.0(13) | 129.0(9)  | <b>126.5(13)</b> |
| C8-N9-C1'         | 124.5(7) | 124.2(8) | 123.8(9)  | 124.4(15) | 124.7(14) | 125.3(9)  | <b>127.0(13)</b> |
| rmsd (114 angles) | 0.38     | 0.74     | 1.20      | 1.38      | 1.07      | 0.79      |                  |

Guanosine sugars (average of 6)

|                        |           |           |           |           |           |           |           |
|------------------------|-----------|-----------|-----------|-----------|-----------|-----------|-----------|
| N9-C1'-C2'             | 115.3(4)  | 115.8(7)  | 114.8(22) | 116.5(7)  | 115.5(9)  | 117.4(13) | 114.2(16) |
| N9-C1'-O4'             | 108.1(6)  | 107.6(12) | 108.0(17) | 106.7(10) | 107.9(10) | 105.2(12) | 107.8(8)  |
| C2'-C1'-O4'            | 106.8(6)  | 106.5(14) | 105.1(20) | 105.5(27) | 106.3(12) | 106.6(10) | 106.1(11) |
| C1'-C2'-C3'            | 103.8(18) | 103.5(21) | 102.6(20) | 104.1(27) | 103.6(29) | 104.7(23) | 102.7(14) |
| C2'-C3'-C4'            | 103.0(3)  | 105.1(13) | 106.3(26) | 104.2(21) | 104.4(5)  | 103.7(8)  | 103.2(10) |
| C2'-C3'-O3'            | 110.7(23) | 114.0(15) | 112.0(41) | 111.2(19) | 110.9(16) | 112.4(22) | 110.6(27) |
| C4'-C3'-O3'            | 109.5(16) | 105.9(6)  | 107.1(30) | 106.8(20) | 110.3(14) | 110.7(22) | 110.3(22) |
| C3'-C4'-C5'            | 112.9(8)  | 112.4(11) | 112.1(24) | 111.5(16) | 113.2(8)  | 114.9(14) | 114.7(15) |
| C3'-C4'-O4'            | 106.1(5)  | 105.0(7)  | 104.9(22) | 103.6(15) | 105.9(9)  | 106.2(8)  | 105.6(10) |
| C5'-C4'-O4'            | 109.1(4)  | 109.4(8)  | 108.6(21) | 108.1(15) | 109.3(7)  | 109.2(6)  | 109.4(16) |
| C1'-O4'-C4'            | 110.4(6)  | 111.4(18) | 112.2(11) | 111.0(19) | 110.2(7)  | 109.2(6)  | 109.7(14) |
| C4'-C5'-O5'            | 107.8(8)  | 105.3(19) | 104.5(35) | 105.7(12) | 109.4(7)  | 109.4(7)  | 110.2(14) |
| C3'-O3'-P <sup>+</sup> | 121.6(5)  | 124.4(5)  | 123.7(50) | 121.6(9)  | 123.9(23) | 122.0(10) | 119.7(12) |
| C5'-O5'-P              | 119.2(11) | 116.2(18) | 118.1(28) | 119.6(19) | 119.7(11) | 120.8(11) | 120.9(16) |
| rmsd (82 angles)       | 1.05      | 1.35      | 2.73      | 1.81      | 1.32      | 1.36      |           |

Phosphodiester (average of 10)

|           |           |           |           |           |           |           |           |
|-----------|-----------|-----------|-----------|-----------|-----------|-----------|-----------|
| O3'-P-O5' | 103.6(26) | 107.3(23) | 104.0(36) | 103.1(25) | 103.4(19) | 103.4(24) | 104.0(19) |
| O3'-P-OP1 | 109.8(23) | 107.7(16) | 108.4(46) | 109.1(29) | 108.9(19) | 109.2(27) | 107.4(32) |

|                  |           |           |           |           |           |           |           |
|------------------|-----------|-----------|-----------|-----------|-----------|-----------|-----------|
| O3'-P-OP2        | 106.3(29) | 103.8(18) | 104.0(58) | 106.4(30) | 106.4(27) | 106.5(26) | 108.3(32) |
| O5'-P-OP1        | 107.2(26) | 105.9(38) | 107.1(44) | 107.7(17) | 108.2(30) | 109.1(26) | 108.1(29) |
| O5'-P-OP2        | 110.3(5)  | 108.7(39) | 108.3(44) | 108.9(17) | 109.2(25) | 108.9(15) | 108.3(27) |
| OP1-P-OP2        | 118.6(9)  | 122.7(23) | 122.8(66) | 120.0(23) | 119.6(12) | 118.7(14) | 119.6(15) |
| rmsd (60 angles) | 2.18      | 2.79      | 4.99      | 2.46      | 2.28      | 2.25      |           |
